# Supplementary material for: A 3D FeOOH nanotube array: an efficient catalyst for ammonia electrosynthesis by nitrite reduction
Source: Royal Society of Chemistry journal article supplement (doi:10.1039/d2cc00611a), 2022-01-01
Supplement: d2cc00611a1.pdf [file d2cc00611a1.pdf]

## Electronic Supplementary Information

### Experimental section

**Materials:** sodium nitrite ( $\text{NaNO}_2$ ), ammonium chloride ( $\text{NH}_4\text{Cl}$ ), sodium hydroxide ( $\text{NaOH}$ ), sodium salicylate ( $\text{C}_7\text{H}_5\text{NaO}_3$ ), trisodium citrate dihydrate ( $\text{C}_6\text{H}_5\text{Na}_3\text{O}_7 \cdot 2\text{H}_2\text{O}$ ), p-dimethylaminobenzaldehyde ( $\text{C}_9\text{H}_{11}\text{NO}$ ), sodium nitroferricyanide dihydrate ( $\text{C}_5\text{FeN}_6\text{Na}_2\text{O} \cdot 2\text{H}_2\text{O}$ ), 0.8 wt% sulfamic acid solution ( $\text{H}_3\text{NO}_3\text{S}$ ), sodium dihydrogen phosphate dihydrate ( $\text{NaH}_2\text{PO}_4$ ), disodium hydrogen phosphate dodecahydrate ( $\text{Na}_2\text{HPO}_4$ ) and sodium hypochlorite solution ( $\text{NaClO}$ ) were purchased from Aladdin Ltd. (Shanghai, China). Iron chloride hexahydrate ( $\text{FeCl}_3 \cdot 6\text{H}_2\text{O}$ ), Cobalt chloride hexahydrate ( $\text{CoCl}_2 \cdot 6\text{H}_2\text{O}$ ), Nickel chloride hexahydrate ( $\text{NiCl}_2 \cdot 6\text{H}_2\text{O}$ ), and urea were purchased from Chengdu Kelong Chemical Regent Co. Ltd. Sulfuric acid ( $\text{H}_2\text{SO}_4$ ), hydrogen peroxide ( $\text{H}_2\text{O}_2$ ), hydrochloric acid ( $\text{HCl}$ ), hydrazine monohydrate ( $\text{N}_2\text{H}_4 \cdot \text{H}_2\text{O}$ ) and ethylalcohol ( $\text{C}_2\text{H}_5\text{OH}$ ) were bought from Beijing Chemical Corporation. (China). chemical Ltd. in Chengdu. Carbon cloth (CC) was purchased from Qingyuan Metal Materials Co., Ltd (Xingtai, China). All reagents used in this work were analytical grade without further purification.

**Preparation of  $(\text{Co},\text{Ni})(\text{CO}_3)_{0.5}$  nanowire array on CC:** All the chemicals in this work were of analytical grade and directly used after purchase without further purification. In a typical synthesis, 2.33 g of  $\text{CoCl}_2 \cdot 6\text{H}_2\text{O}$ , 1.16 g of  $\text{NiCl}_2 \cdot 6\text{H}_2\text{O}$ , and 1.44 g of urea were dissolved in 80 mL deionized water under violent stirring for 20 min at room temperature. A piece of CC ( $2 \times 4$  cm) was immersed with concentrated  $\text{HNO}_3$  solution for 2 h, and then cleaned with acetone, ethanol and deionized water for 10 min each. The solution was transferred into a 100 mL Teflon-lined autoclave and the cleaned CC substrate was immersed into the solution. The autoclave was sealed and maintained at  $120^\circ\text{C}$  for 6 h. After the autoclave cooling to room temperature naturally, as-obtained precursor was taken out, washed with ethanol and distilled water for several times, and dried at  $70^\circ\text{C}$  for 6 h.

**Preparation of FeOOH nanotube arrays on CC:** To convert into the FeOOH nanotube arrays, 3.24 g  $\text{FeCl}_3 \cdot 6\text{H}_2\text{O}$  was dissolved in 300 mL deionized water with stirring for 30 min to form a yellow solution. Subsequently, the above CC grown with

(Co,Ni)(CO<sub>3</sub>)<sub>0.5</sub> precursor nanowire arrays were immersed in the solution and maintained at 50 °C for 6 h. An ion-exchange process in a hydrothermal system is an efficient strategy to obtain hollow nanoarchitecture materials based on the nanoscale Kirkendall effect due to the fast ion-exchange rate in the hydrothermal process. Based on the Kirkendall effect, the ionic transport rate from the crystals to the solution should be faster than that from the solution to the crystals. In our case, Ni<sup>2+</sup> and Co<sup>2+</sup> diffuse toward outward while Fe<sup>3+</sup> diffuse toward inward through the formed layer. As the reaction proceeds, FeOOH nanotube arrays are formed ultimately. The reactions could be described by the following equation:

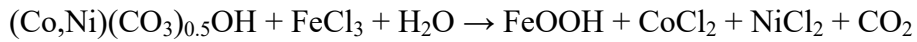

**Characterizations:** XRD data were acquired by a LabX XRD-6100 X-ray diffractometer with a Cu K $\alpha$  radiation (40 kV, 30 mA) of wavelength 0.154 nm (SHIMADZU, Japan). SEM measurements were carried out on a GeminiSEM 300 scanning electron microscope (ZEISS, Germany) at an accelerating voltage of 5 kV. XPS measurements were performed on an ESCALABMK II X-ray photoelectron spectrometer using Mg as the exciting source. The absorbance data of spectrophotometer was measured on UV-Vis spectrophotometer. TEM image was obtained from a Zeiss Libra 200FE transmission electron microscope operated at 200 kV.

**Electrochemical measurements:** All electrochemical measurements were performed in a two-compartment cell separated by a treated Nafion 117 membrane using the CHI660E electrochemical workstation (Shanghai, Chenhua) with a standard three-electrode setup. To prevent the pH of the reaction medium from changing significantly during the reaction, phosphate buffer saline (PBS) was used as electrolyte and was prepared by mixing stock solutions of NaH<sub>2</sub>PO<sub>4</sub> and Na<sub>2</sub>HPO<sub>4</sub>. Electrolyte solution was Ar-saturated 0.1 M PBS (pH = 7) with 0.1 M NO<sub>3</sub><sup>-</sup>, using FeOOH/CC (1.0 × 0.5 cm<sup>2</sup>) as the working electrode, a carbon rod as the counter electrode, and a Ag/AgCl as the reference electrode. All the potentials reported in our work were converted to reversible hydrogen electrode (RHE) scale via calibration with the following equation: E (RHE) = E (vs. Ag/AgCl) + 0.0591 × pH + 0.197 V

and the current density was normalized by the geometric surface area.

**Determination of NH<sub>3</sub>:** Concentration of produced NH<sub>3</sub> was determined by spectrophotometry measurement with indophenol blue method (the obtained electrolyte was diluted 50 times).<sup>1</sup> In detail, 2 mL of the diluted catholyte was obtained from the cathodic chamber and mixed with 2 mL of a 1 M NaOH solution that contained salicylic acid and sodium citrate. Then, 1 mL of 0.05 M NaClO and 0.2 mL of 1 wt% C<sub>5</sub>FeN<sub>6</sub>Na<sub>2</sub>O were dropped in the collected electrolyte solution. After standing at room temperature for 2 h, the ultraviolet-visible absorption spectrum was measured. The concentration-absorbance curve was calibrated using the standard NH<sub>4</sub>Cl solution with NH<sub>3</sub> concentrations of 0, 0.2, 0.5, 1.0, 2.0 and 5.0 μg mL<sup>-1</sup> in 0.1 M PBS. The absorbance at 655 nm was measured to quantify the NH<sub>3</sub> concentration using standard NH<sub>4</sub>Cl solutions ( $y = 0.4266x + 0.03451$ ,  $R^2 = 0.999$ ).

**Determination of N<sub>2</sub>H<sub>4</sub>:** In this work, we used the method of Watt and Chrisp<sup>2</sup> to determine the concentration of produced N<sub>2</sub>H<sub>4</sub>. The chromogenic reagent was a mixed solution of 5.99 g C<sub>9</sub>H<sub>11</sub>NO, 30 mL HCl and 300 mL C<sub>2</sub>H<sub>5</sub>OH. In detail, 1 mL electrolyte was added into 1 mL prepared color reagent and stirred for 15 min in the dark. The absorbance at 455 nm was measured to quantify the N<sub>2</sub>H<sub>4</sub> concentration with a standard curve of hydrazine ( $y = 0.6691x + 0.07883$ ,  $R^2 = 0.999$ ).

**Calculations of FE and NH<sub>3</sub> yield:**

$$FE = (8 \times F \times [\text{NH}_3] \times V) / (M_{\text{NH}_3} \times Q) \times 100\%$$

$$\text{NH}_3 \text{ yield} = ([\text{NH}_3] \times V) / (t \times A)$$

Where F is the Faradic constant (96485 C mol<sup>-1</sup>), [NH<sub>3</sub>] is the measured NH<sub>3</sub> concentration, V is the volume of electrolyte (35 mL), M<sub>NH<sub>3</sub></sub> is the molar mass of NH<sub>3</sub>, Q is the total charge passing through the electrode; t is the electrolysis time and A is the geometric area of working electrode (0.5 × 0.5 cm<sup>2</sup>).

**NO<sub>2</sub><sup>-</sup> isotopic labelling experiment:** The generated NH<sub>3</sub> was verified by an isotope-labelled tracer experiment using a 0.1 M <sup>15</sup>NO<sub>2</sub><sup>-</sup> as a N source. After 1 h of electroreduction at -1.0 V, the electrolyte (2 mL) in the cathodic chamber was neutralized by HCl aqueous solution (1.2 M). After that, the neutralized electrolyte

(500  $\mu\text{L}$ ) was mixed with deuterium oxide ( $\text{D}_2\text{O}$ , 50  $\mu\text{L}$ ). And the mixture was sealed into a nuclear magnetic resonance (NMR) tube (5 mm in diameter, 600 MHz) for further tests.

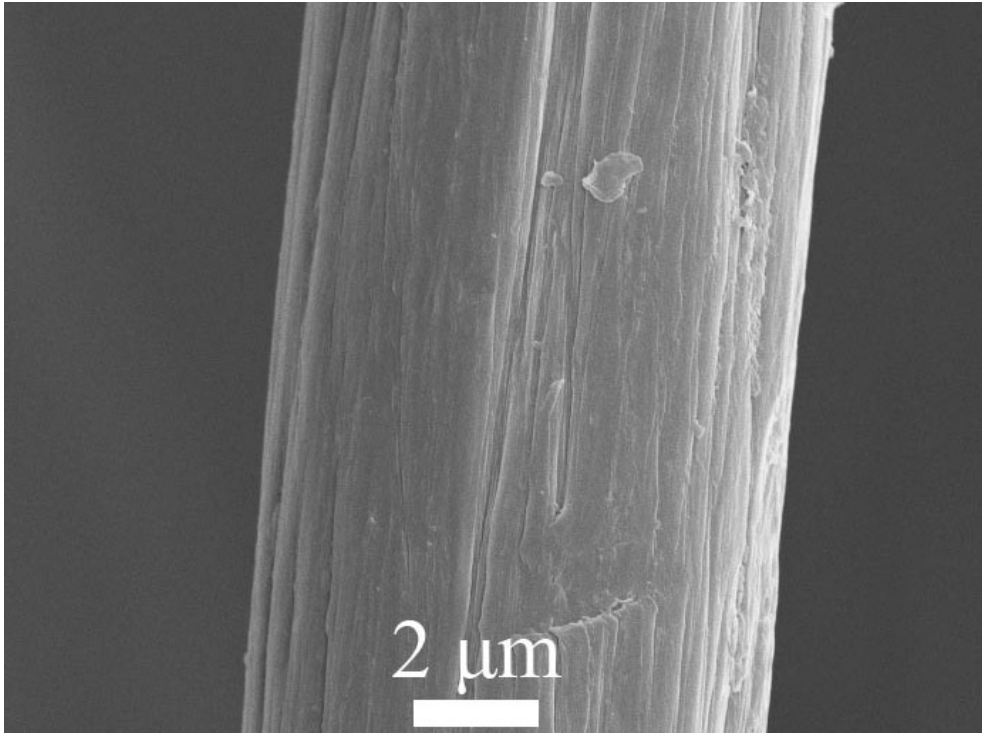

**Fig. S1** SEM image of bare CC.

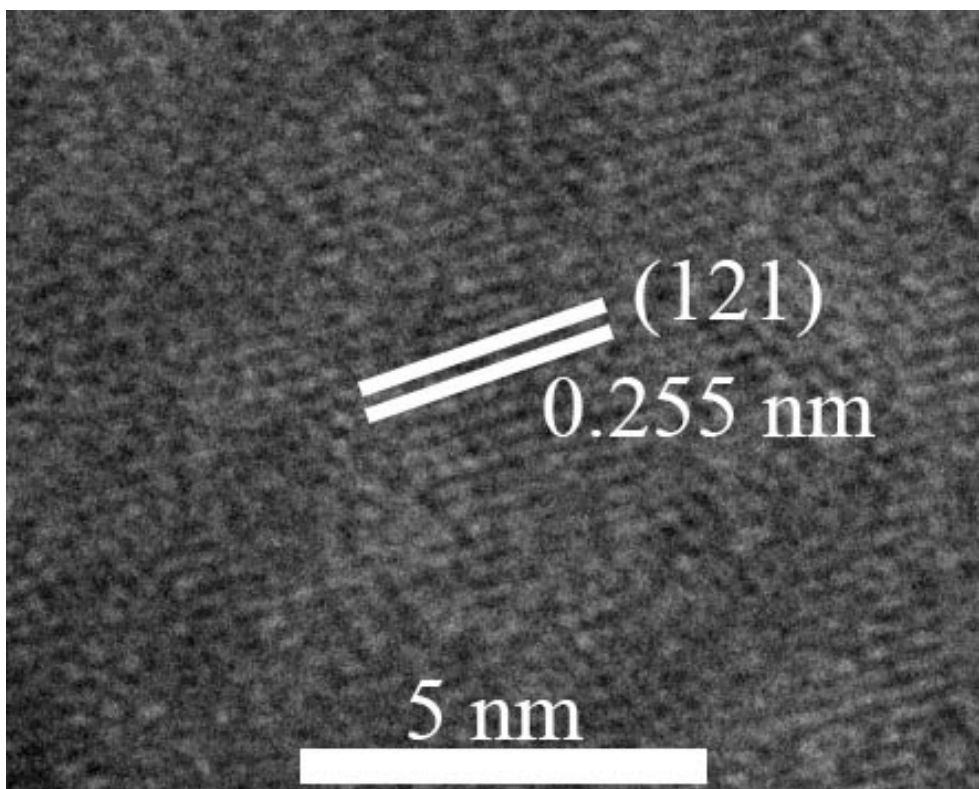

**Fig. S2** HRTEM image of FeOOH.

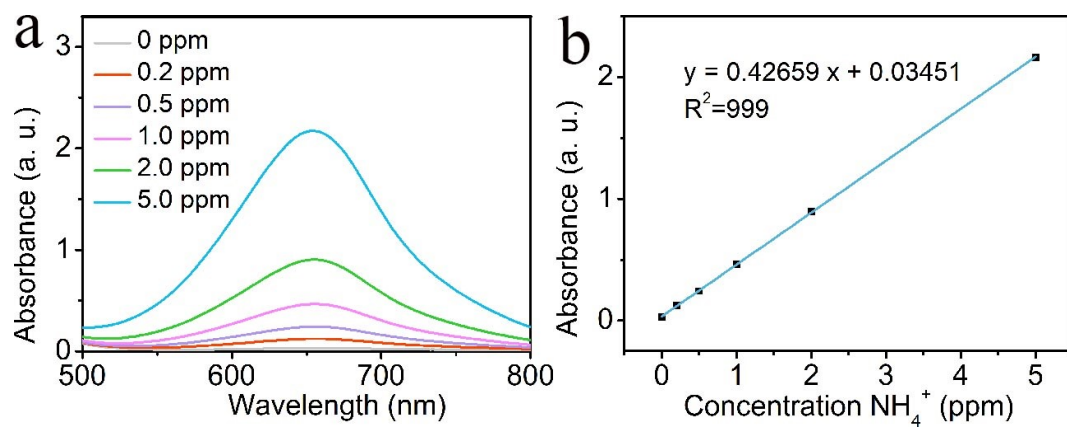

**Fig. S3** (a) UV-Vis absorption spectra of indophenol assays kept with different concentrations of  $\text{NH}_4^+$  after incubated for 2 h at room temperature. (b) Calibration curve used for estimation of  $\text{NH}_4^+$  concentration.

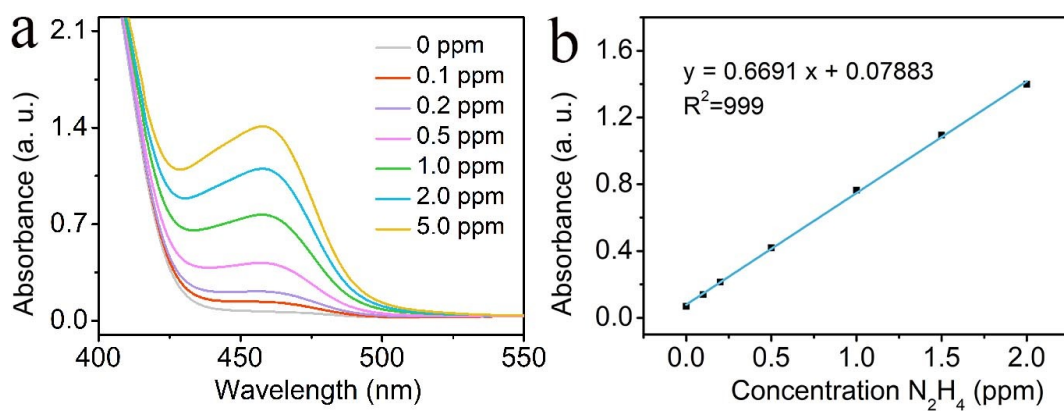

**Fig. S4** (a) UV-Vis absorption spectra of various  $N_2H_4$  concentrations after incubated for 15 min at room temperature. (b) Calibration curve used for calculation of  $N_2H_4$  concentration.



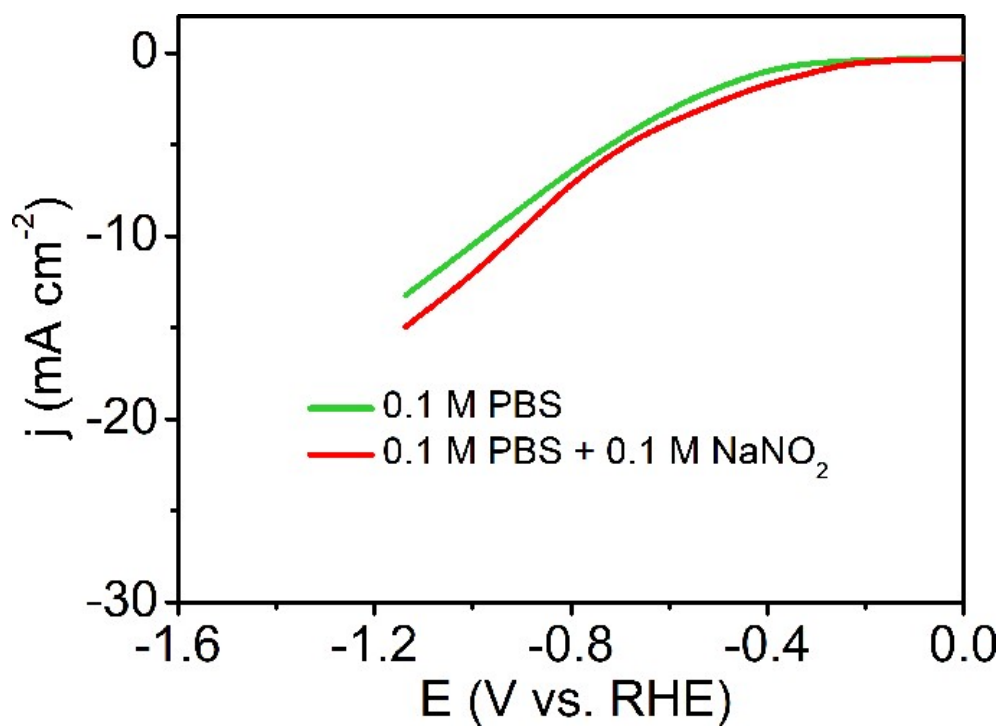

**Fig. S5** LSV curves of bare CC in 0.1 M PBS with and without 0.1 M NO<sub>2</sub><sup>-</sup>.

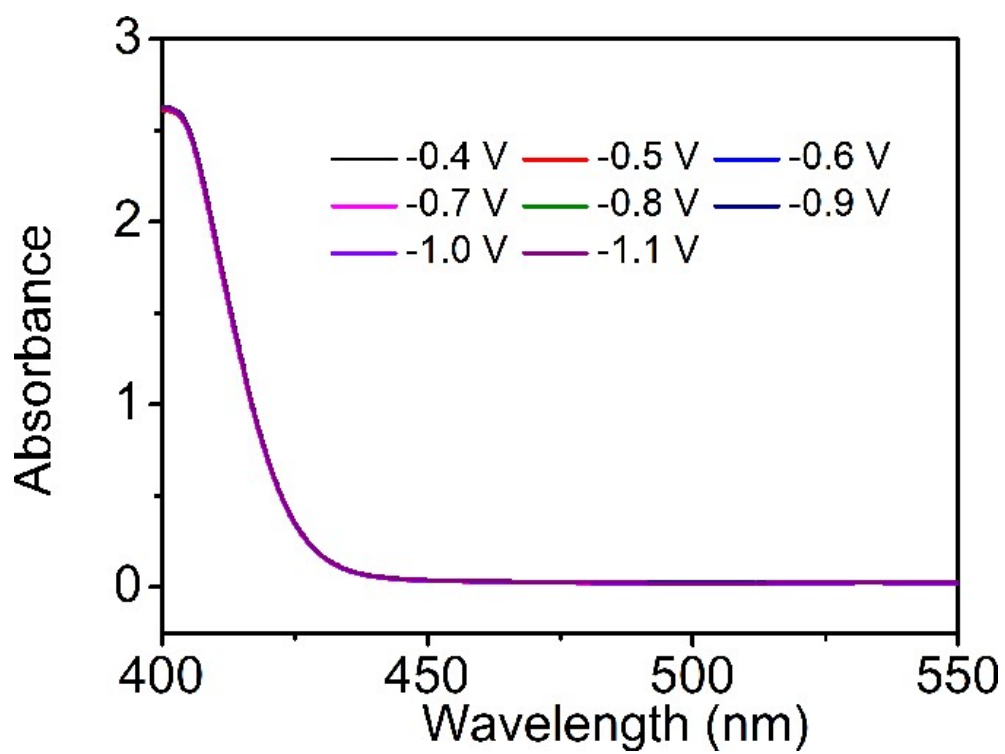

**Fig. S6** UV-Vis absorption spectra of the electrolytes estimated by the method of Watt and Chrisp for the calculation of  $\text{N}_2\text{H}_4$  concentration.

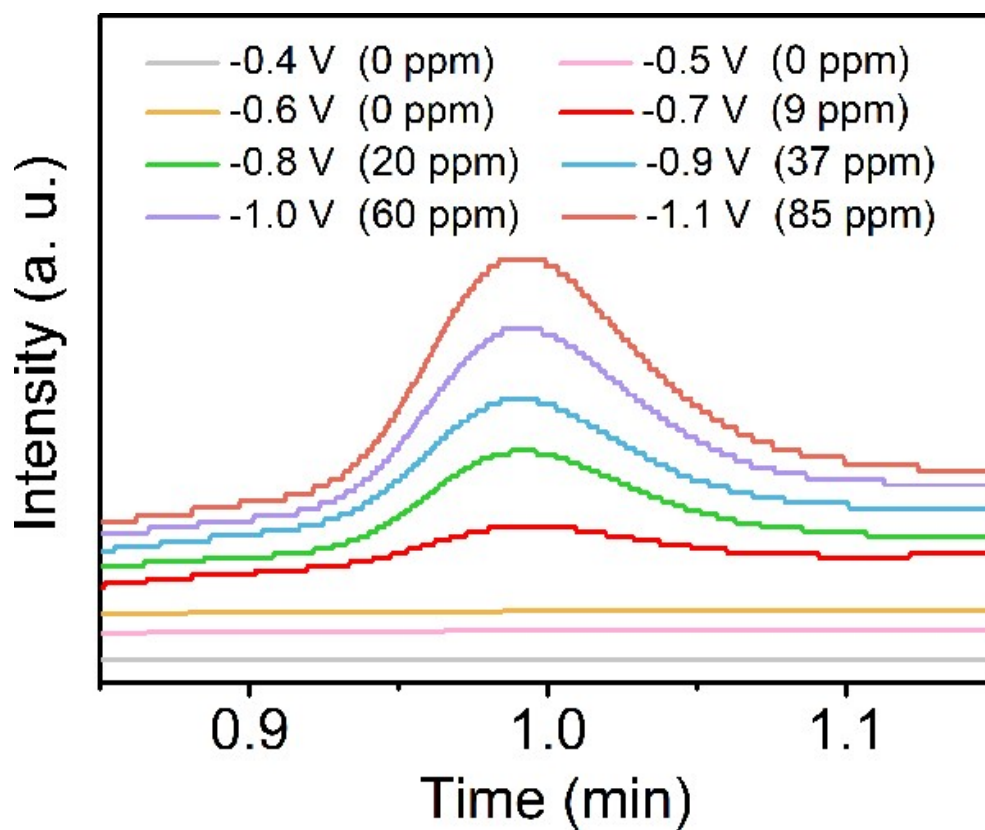

Fig. S7 Chromatograph curves of FeOOH NTA/CC in 0.1 M PBS with 0.1 M  $\text{NO}_2^-$ .

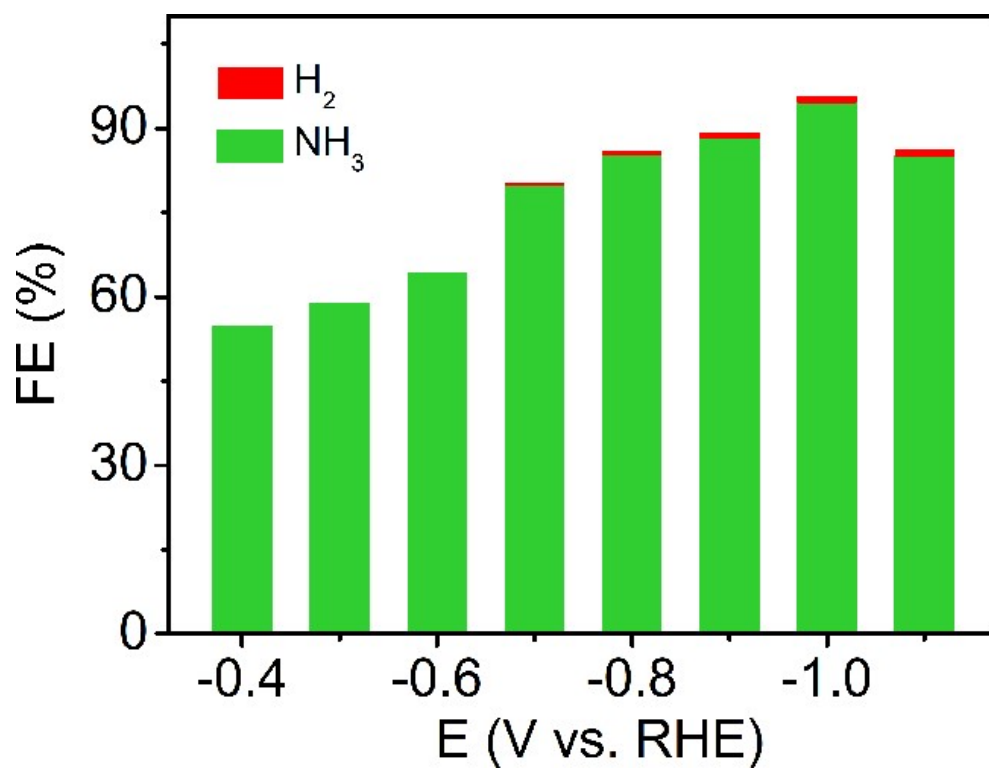

**Fig. S8** The FEs of H<sub>2</sub> and NH<sub>3</sub>.

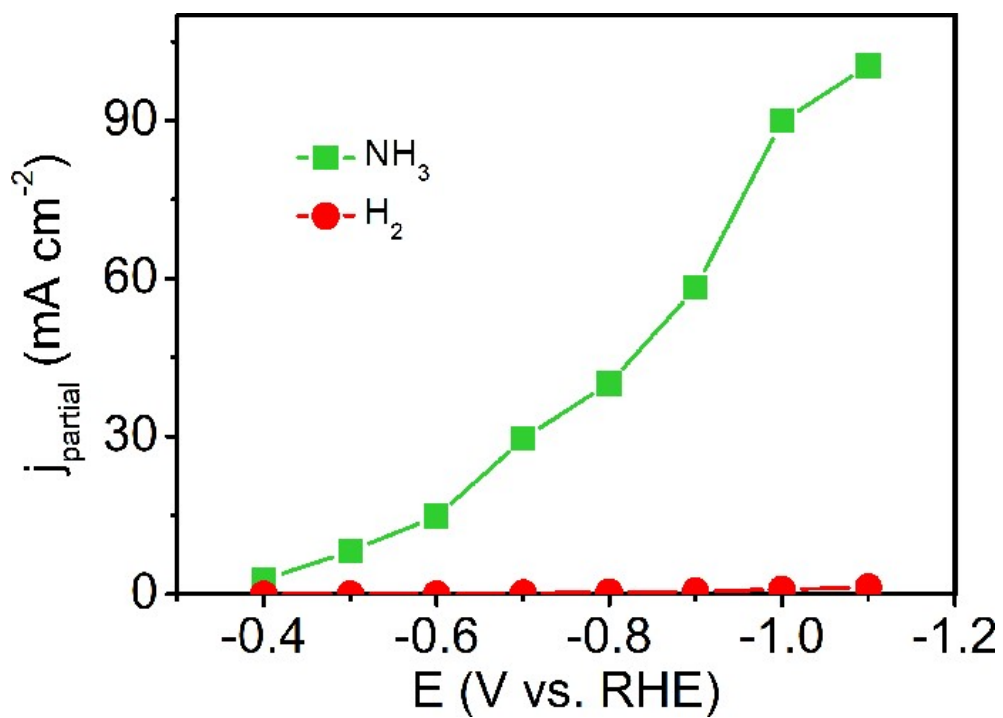

**Fig. S9** Comparison of potential-dependant partial current density for different products on FeOOH NTA/CC with the total current density.

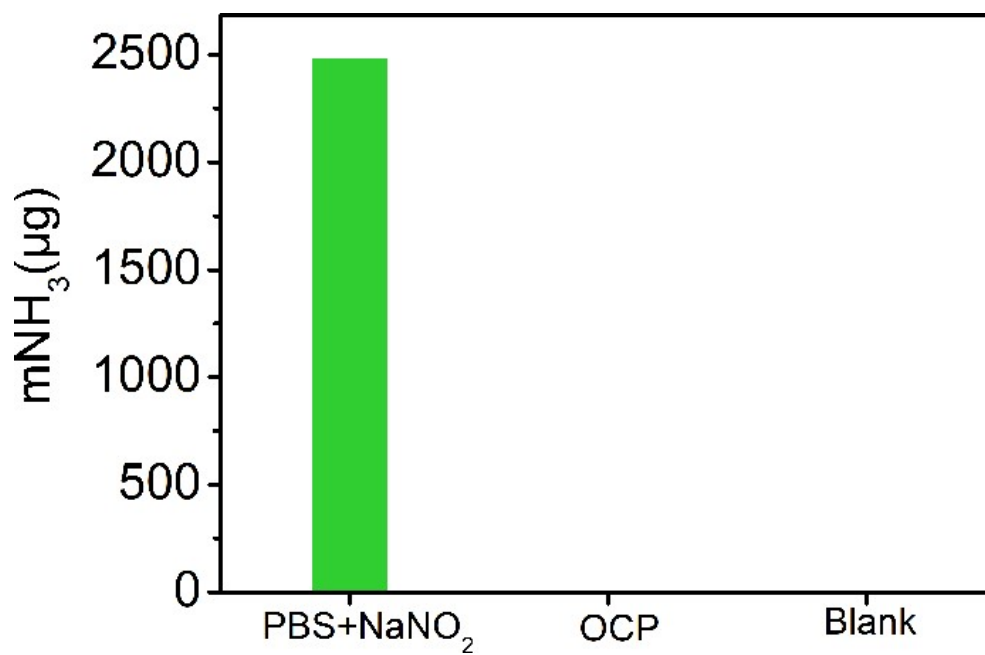

**Fig. S10** Comparison of NH<sub>3</sub> concentration under different conditions.

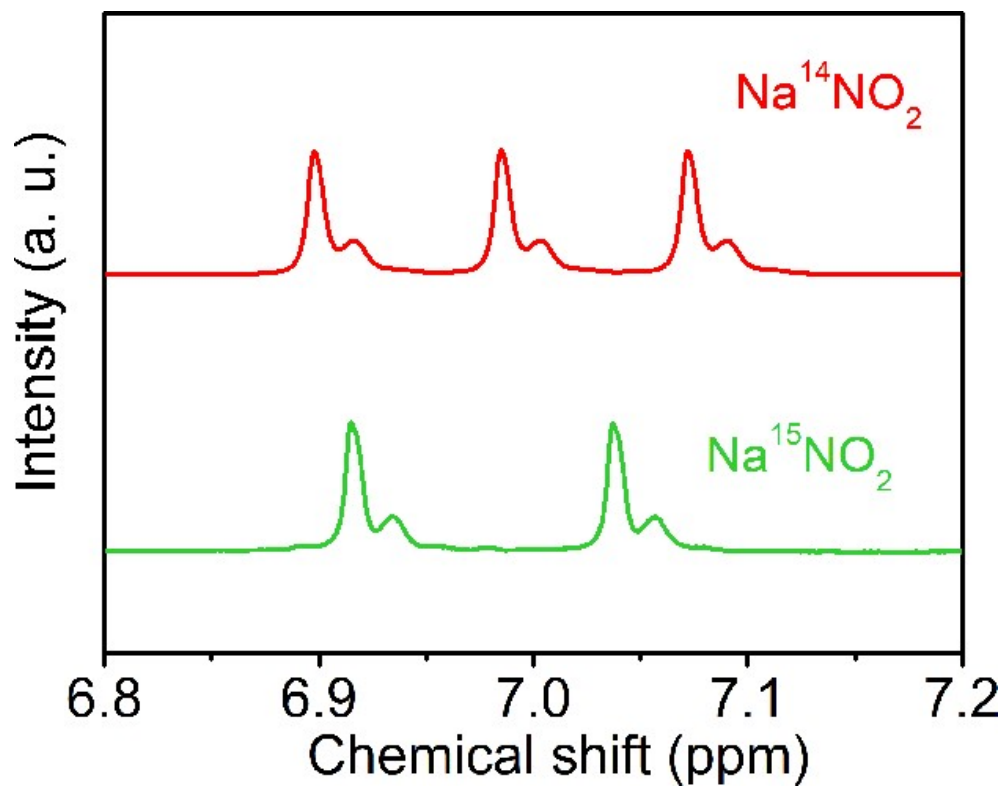

**Fig. S11**  $^1\text{H}$  NMR spectra for the post-electrolysis electrolyte with  $\text{Na}^{15}\text{NO}_2$  and  $\text{Na}^{14}\text{NO}_2$  as the nitrogen resources.

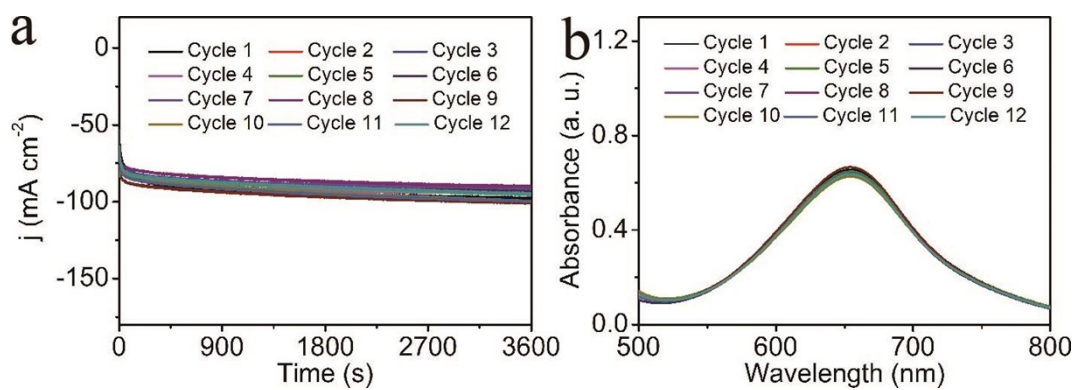

**Fig. S12** Chronoamperometry curves of recycling tests at  $-1.0$  V in  $0.1$  M PBS with  $0.1$  M  $\text{NO}_2^-$  for FeOOH NTA/CC. (b) UV-Vis absorption spectra of the electrolytes stained with indophenol indicator after recycling tests for  $\text{NO}_2\text{RR}$  at  $-1.0$  V in  $0.1$  M PBS with  $0.1$  M  $\text{NO}_2^-$ .



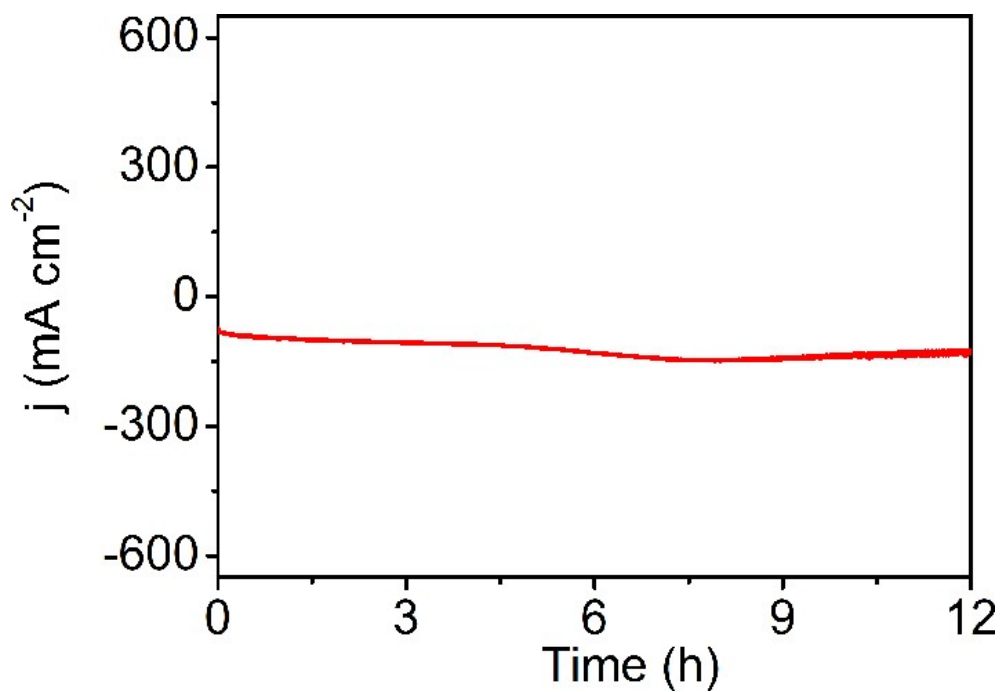

**Fig. S13** Long-term stability tests for continuous generation of  $\text{NH}_3$  on FeOOH NTA/CC.

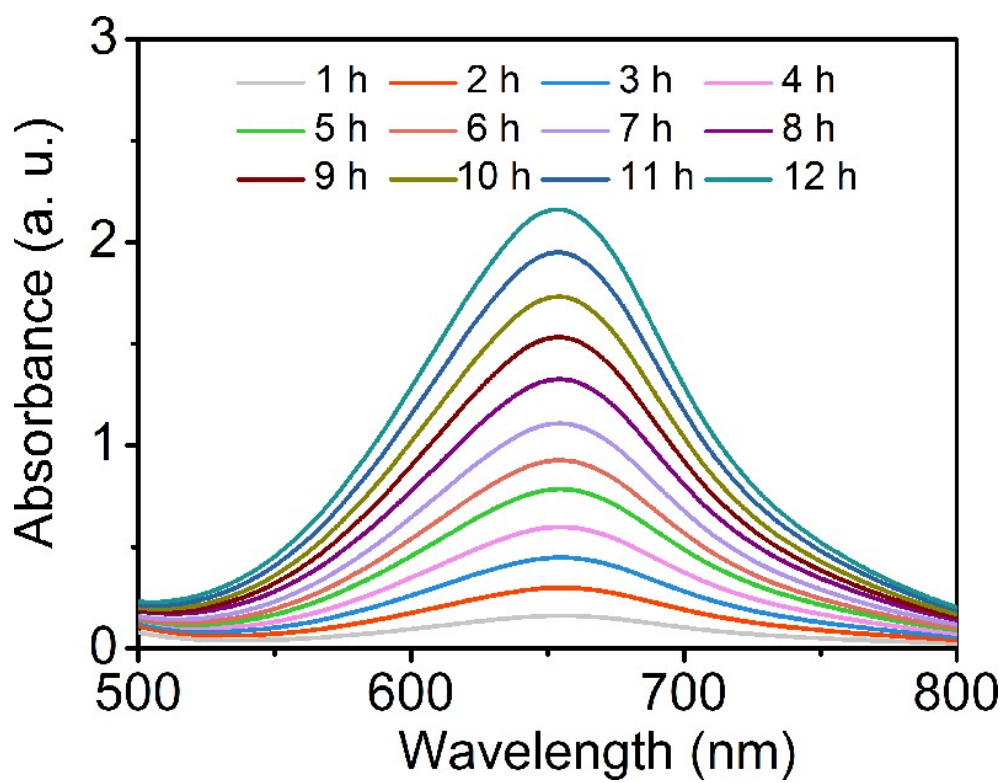

**Fig. S14** UV-Vis absorption spectra of the electrolytes stained with indophenol indicator after 12 h electrolysis on FeOOH NTA/CC at  $-1.0$  V.

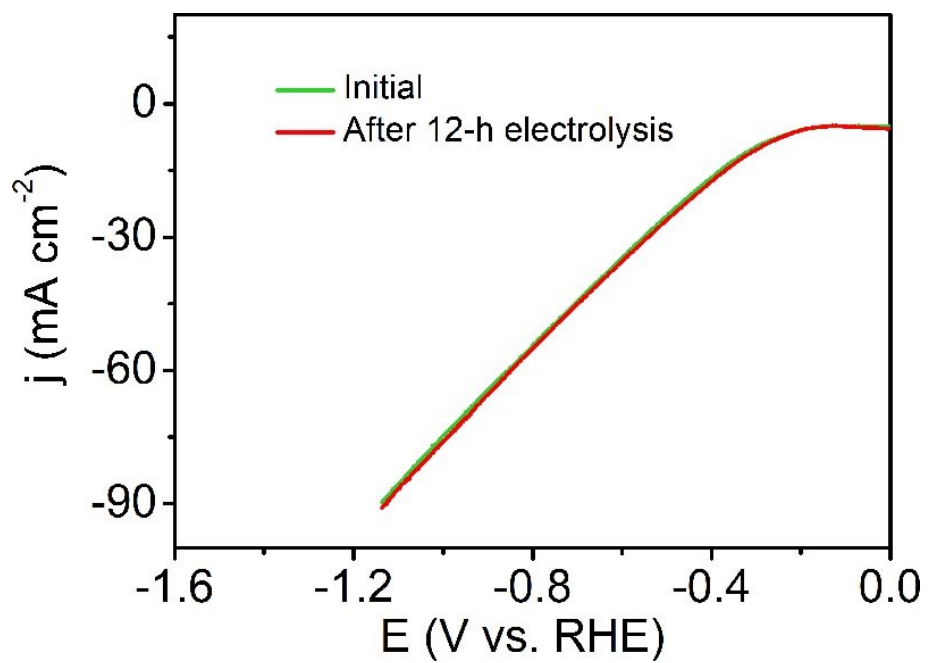

**Fig. S15** LSV curves of FeOOH NTA/CC before and after 12-h electrolysis.

**Table S1.** Comparison of catalytic performance of FeOOH NA/CC with other reported NO<sub>2</sub>RR electrocatalysts.

| Catalyst                                                                 | Electrolyte                                                                  | NH <sub>3</sub> yield                                         | FE (%) | Ref.      |
|--------------------------------------------------------------------------|------------------------------------------------------------------------------|---------------------------------------------------------------|--------|-----------|
| FeOOH NTA/CC                                                             | 0.1 M PBS<br>(0.1 M NO <sub>2</sub> <sup>-</sup> )                           | 11937 μg h <sup>-1</sup> cm <sup>-2</sup>                     | 94.7   | This work |
| Ni-NSA-V <sub>Ni</sub>                                                   | 0.2 M Na <sub>2</sub> SO <sub>4</sub><br>(200 ppm NaNO <sub>2</sub> )        | 235.98 μmol h <sup>-1</sup> cm <sup>-2</sup>                  | 88.9   | 3         |
| MnO <sub>2</sub> nanoarrays                                              | 0.1 M Na <sub>2</sub> SO <sub>4</sub><br>(NaNO <sub>2</sub> )                | 3.09 × 10 <sup>-11</sup> mol s <sup>-1</sup> cm <sup>-2</sup> | 6      | 4         |
| Cobalt-tripeptide complex                                                | 1.0 M MOPS buffer<br>(1.0 M NaNO <sub>2</sub> )                              | 3.01 × 10 <sup>-10</sup> mol s <sup>-1</sup> cm <sup>-2</sup> | 90±3   | 5         |
| Poly-NiTRP complex                                                       | 0.1 M NaClO <sub>4</sub><br>(NaNO <sub>2</sub> )                             | 1.1 mM                                                        | -      | 6         |
| Cu phthalocyanine complexes                                              | 0.1 M KOH (NaNO <sub>2</sub> )                                               | -                                                             | 78     | 7         |
| [Co(DIM)Br <sub>2</sub> ] <sup>+</sup><br>(Carbon rod working electrode) | 0.1 M solution of<br>NaNO <sub>2</sub>                                       | -                                                             | 88     | 8         |
| Oxo-MoS <sub>x</sub>                                                     | 0.1 M nitrite in 0.2 M<br>citric acid (pH=5)                                 | -                                                             | 13.5   | 9         |
| Hemin-pyrolitic<br>graphite electrode                                    | 0.1 M phosphate<br>buffer solutions with<br>NaNO <sub>2</sub> (acidic media) | -                                                             | -      | 10        |
| Cu <sub>x</sub> Ir <sub>1-x</sub> Nanoalloy                              | 0.1 M phosphate<br>buffer (100 mg L <sup>-1</sup> )                          | -                                                             | -      | 11        |
| Rh/Al <sub>2</sub> O <sub>3</sub>                                        | 25 mM phosphate<br>buffer (50 mM NO <sub>2</sub> <sup>-</sup> )              | -                                                             | -      | 12        |
| FeN <sub>5</sub> H <sub>2</sub>                                          | 1.0 M MOPS                                                                   | -                                                             | 18     | 13        |

|                                   |                                          |   |      |    |
|-----------------------------------|------------------------------------------|---|------|----|
|                                   | (1.0 M NaNO <sub>2</sub> )               |   |      |    |
| Cu <sub>80</sub> Ni <sub>20</sub> | 1.0 M NaOH<br>(20 mM NaNO <sub>2</sub> ) | - | 87.6 | 14 |

**Table S2.** pH value of FeOOH NA/CC before and after electrolysis.

|                       |     |     |      |
|-----------------------|-----|-----|------|
| electrolytic time (h) | 0   | 1   | 12   |
| pH                    | 7.0 | 7.4 | 12.3 |

---

## References

- 1 D. Zhu, L. Zhang, R. E. Ruther and R. J. Hamers, *Nat. Mater.*, 2013, **12**, 836–841.
- 2 G. W. Watt and J. D. Chrisp, *Anal. Chem.*, 1952, **24**, 2006–2008.
- 3 C. Wang, W. Zhou, Z. Sun, Y. Wang, B. Zhang and Y. Yu, *J. Mater. Chem. A*, 2021, **9**, 239–243.
- 4 R. Wang, Z. Wang, X. Xiang, R. Zhang, X. Shi and X. Sun, *Chem. Commun.*, 2018, **54**, 10340–10342.
- 5 Y. Guo, J. R. Stroka, B. Kandemir, C. E. Dickerson and K. L. Bren, *J. Am. Chem. Soc.*, 2018, **140**, 16888–16892.
- 6 P. Dreyse, M. Isaacs, K. Calfumán, C. Cáceres, A. Aliaga, M. J. Aguirre and D. Villagra, *Electrochim. Acta*, 2011, **56**, 5230–5237.
- 7 N. Chebotareva and T. Nyokong, *J. Appl. Electrochem.*, 1997, **27**, 975–981.
- 8 S. Xu, H. Y. Kwon, D. C. Ashley, C. H. Chen, E. Jakubikova and J. M. Smith, *Inorg. Chem.*, 2019, **58**, 9443–9451.
- 9 D. He, Y. Li, H. Ooka, Y. K. Go, F. Jin, S. H. Kim and R. Nakamura, *J. Am. Chem. Soc.*, 2018, **140**, 2012–2015.
- 10 M. Duca, S. Khamseh, S. C. S. Lai and M. T. M. Koper, *Langmuir*, 2010, **26**, 12418–12424.
- 11 H. Li, C. Yan, H. Guo, K. Y. Shin, S. M. Humphrey, C. J. Werth and G. Henkelman, *ACS Catal.*, 2020, **10**, 7915–7921.
- 12 C. A. Clark, C. P. Reddy, H. Xu, K. N. Heck, G. Luo and T. P. Senftle, *ACS Catal.*, 2020, **10**, 494–509.
- 13 J. R. Stroka, B. Kandemir, E. M. Matson and K. L. Bren, *ACS Catal.*, 2020, **10**, 13968–13972.
- 14 L. Mattarozzi, S. Cattarin, N. Comisso, P. Guerriero, Marco Musiani, L. Vázquez-Gómez and E. Verlato, *Electrochim. Acta*, 2013, **89**, 488–496.
